# Supplementary material for: Characterization of a novel N-acylhomoserine lactonase, AidP, from Antarctic Planococcus sp
Source: Microb Cell Fact. 2018 Nov 17;17:179. doi: 10.1186/s12934-018-1024-6 (PMC6240239; doi:10.1186/s12934-018-1024-6)
Supplement: Supplementary file 2 — Additional file 2: Table S3. Amino acid usage analysis based on aligned region AidP gene and the nearest homologous gene based on NCBI BLAST result. [file 12934_2018_1024_MOESM2_ESM.xlsx]

## Sheet: Sheet1
	Planococcus versutus	Planococcus antarcticus	Planococcus faecalis	Planococcus kocurii_ATCC_43650	Lysinibacillus_sp_YS11	Lysinibacillus_sphaericus_2362	Lysinibacillus_sphaericus_III	Lysinibacillus_sphaericus_C3_41	Lysinibacillus_sp_Gs50_adeH	Lysinibacillus_varians_GY32	Lysinibacillus_sp_B2A1	Lysinibacillus_sphaericus_DSM_28	Lysinibacillus_fusiformis_RB_21	Sporosarcina_ureae_P32a	Bacillus_megaterium_NBRC_15308	Aeribacillus_pallidus_KCTC3564	Bacillus_caldolyticus_NEB414	Geobacillus_thermoleovorans_FJAT_2391	Geobacillus_thermoleovorans_KCTC_3570	Geobacillus_sp_JS12	Geobacillus_sp_C56_T3	Anoxybacillus_sp_B7M1	Anoxybacillus_sp_B2M1	Geobacillus_stearothermophilus_10	Geobacillus_sp_Y412MC52	Geobacillus_sp_Y412MC61	Brevibacillus_brevis_NBRC_100599	Geobacillus_sp_Y4_1MC1	Paenibacillus_riograndensis_SBR5	Parageobacillus_thermoglucosidasius	Parageobacillus_thermoglucosidasius	Paenibacillus_graminis_DSM_15220	Geobacillus_sp_WCH70	Paenibacillus_kribbensis_AM49	Paenibacillus_naphthalenovorans_32O_Y	Staphylococcus_carnosus	Staphylococcus_piscifermentans	Staphylococcus_sciuri_ahlS	Staphylococcus_haemolyticus_83131B	Solibacillus_silvestris_DSM_12223	Staphylococcus_haemolyticus_S167	Thermaerobacter_composti_aiiT	Thermaerobacter_marianensis_DSM_12885
Ala (A)	0.064	0.06	0.067	0.067	0.053	0.056	0.056	0.056	0.057	0.057	0.053	0.057	0.056	0.053	0.071	0.078	0.082	0.082	0.082	0.082	0.074	0.071	0.071	0.074	0.074	0.074	0.085	0.067	0.074	0.067	0.067	0.071	0.074	0.074	0.092	0.074	0.074	0.078	0.078	0.054	0.082	0.072	0.068
Arg (R)	0.028	0.028	0.028	0.028	0.039	0.039	0.039	0.038	0.038	0.038	0.039	0.039	0.039	0.036	0.028	0.039	0.057	0.057	0.057	0.057	0.057	0.043	0.043	0.053	0.053	0.053	0.042	0.046	0.032	0.046	0.046	0.032	0.05	0.043	0.043	0.018	0.021	0.025	0.025	0.032	0.025	0.072	0.076
Asn (N)	0.057	0.05	0.053	0.05	0.064	0.07	0.07	0.07	0.065	0.065	0.071	0.078	0.074	0.071	0.064	0.06	0.067	0.067	0.067	0.067	0.071	0.05	0.05	0.071	0.071	0.071	0.067	0.067	0.064	0.064	0.064	0.064	0.064	0.074	0.057	0.057	0.057	0.082	0.071	0.051	0.067	0.036	0.036
Asp (D)	0.053	0.06	0.057	0.057	0.057	0.056	0.056	0.056	0.061	0.061	0.05	0.053	0.06	0.057	0.05	0.053	0.046	0.046	0.046	0.046	0.046	0.046	0.046	0.046	0.046	0.046	0.042	0.046	0.053	0.046	0.046	0.053	0.046	0.046	0.05	0.099	0.096	0.071	0.078	0.051	0.078	0.076	0.068
Cys (C)	0.011	0.011	0.011	0.011	0.011	0.011	0.011	0.01	0.011	0.011	0.011	0.011	0.011	0.011	0.014	0.011	0.014	0.014	0.014	0.014	0.014	0.014	0.014	0.014	0.014	0.014	0.011	0.014	0.011	0.014	0.014	0.011	0.014	0.011	0.011	0.014	0.011	0.011	0.011	0.014	0.011	0.022	0.022
Gln (Q)	0.032	0.032	0.028	0.028	0.036	0.035	0.035	0.035	0.038	0.038	0.032	0.025	0.032	0.028	0.039	0.028	0.043	0.043	0.043	0.043	0.039	0.035	0.035	0.039	0.039	0.039	0.028	0.039	0.043	0.039	0.039	0.043	0.039	0.028	0.039	0.035	0.035	0.035	0.032	0.022	0.032	0.036	0.036
Glu (E)	0.074	0.071	0.071	0.071	0.071	0.07	0.07	0.073	0.073	0.073	0.078	0.075	0.067	0.078	0.074	0.078	0.082	0.082	0.082	0.082	0.078	0.078	0.078	0.078	0.078	0.078	0.077	0.078	0.067	0.078	0.078	0.067	0.078	0.078	0.067	0.06	0.064	0.067	0.068	0.087	0.067	0.05	0.058
Gly (G)	0.085	0.085	0.085	0.085	0.078	0.081	0.081	0.08	0.08	0.08	0.078	0.078	0.081	0.075	0.071	0.071	0.064	0.064	0.064	0.064	0.064	0.067	0.067	0.064	0.064	0.064	0.067	0.067	0.071	0.067	0.067	0.071	0.067	0.067	0.074	0.067	0.067	0.074	0.064	0.079	0.064	0.083	0.083
His (H)	0.032	0.035	0.035	0.035	0.046	0.042	0.042	0.042	0.042	0.042	0.046	0.043	0.042	0.043	0.043	0.046	0.043	0.043	0.043	0.043	0.042	0.064	0.064	0.039	0.039	0.039	0.046	0.043	0.035	0.043	0.043	0.035	0.043	0.043	0.035	0.035	0.035	0.025	0.032	0.04	0.032	0.043	0.04
Ile (I)	0.071	0.067	0.067	0.067	0.075	0.074	0.074	0.073	0.076	0.076	0.078	0.075	0.074	0.078	0.067	0.071	0.071	0.071	0.071	0.071	0.071	0.071	0.071	0.074	0.074	0.074	0.085	0.082	0.089	0.082	0.082	0.085	0.082	0.089	0.071	0.082	0.085	0.078	0.071	0.069	0.074	0.068	0.061
Leu (L)	0.089	0.089	0.096	0.096	0.068	0.067	0.067	0.066	0.069	0.069	0.068	0.068	0.067	0.068	0.078	0.064	0.067	0.067	0.067	0.067	0.067	0.074	0.074	0.067	0.067	0.067	0.067	0.064	0.082	0.064	0.064	0.082	0.064	0.078	0.071	0.067	0.067	0.074	0.068	0.079	0.071	0.104	0.104
Lys (K)	0.053	0.053	0.053	0.053	0.05	0.049	0.049	0.049	0.042	0.042	0.05	0.05	0.049	0.043	0.05	0.06	0.035	0.035	0.035	0.035	0.042	0.05	0.05	0.046	0.046	0.046	0.049	0.046	0.053	0.05	0.05	0.053	0.05	0.043	0.05	0.067	0.067	0.06	0.078	0.058	0.082	0.018	0.018
Met (M)	0.032	0.032	0.028	0.028	0.043	0.046	0.046	0.049	0.031	0.031	0.039	0.043	0.046	0.039	0.032	0.032	0.035	0.035	0.035	0.035	0.039	0.043	0.043	0.035	0.039	0.039	0.035	0.043	0.025	0.043	0.043	0.039	0.043	0.028	0.035	0.035	0.035	0.032	0.043	0.04	0.043	0.029	0.029
Phe (F)	0.035	0.035	0.035	0.035	0.043	0.046	0.046	0.045	0.046	0.046	0.039	0.046	0.046	0.043	0.035	0.043	0.035	0.035	0.035	0.035	0.035	0.039	0.039	0.035	0.035	0.035	0.028	0.035	0.032	0.035	0.035	0.032	0.035	0.028	0.035	0.035	0.035	0.035	0.039	0.043	0.035	0.029	0.029
Pro (P)	0.057	0.057	0.06	0.06	0.06	0.06	0.06	0.059	0.061	0.061	0.06	0.057	0.06	0.06	0.057	0.05	0.05	0.05	0.05	0.05	0.053	0.053	0.053	0.053	0.053	0.053	0.046	0.053	0.053	0.053	0.053	0.046	0.05	0.05	0.057	0.039	0.039	0.039	0.039	0.065	0.032	0.058	0.058
Ser (S)	0.053	0.053	0.053	0.057	0.036	0.035	0.035	0.035	0.034	0.034	0.036	0.036	0.032	0.043	0.043	0.039	0.032	0.032	0.032	0.032	0.028	0.039	0.039	0.028	0.028	0.028	0.049	0.046	0.043	0.046	0.046	0.046	0.039	0.057	0.05	0.057	0.053	0.039	0.032	0.043	0.032	0.05	0.05
Thr (T)	0.067	0.067	0.064	0.064	0.05	0.046	0.046	0.045	0.053	0.053	0.05	0.05	0.049	0.057	0.064	0.06	0.05	0.05	0.05	0.05	0.049	0.057	0.057	0.05	0.049	0.049	0.053	0.05	0.06	0.05	0.05	0.057	0.05	0.05	0.05	0.053	0.057	0.053	0.057	0.047	0.06	0.036	0.036
Trp (W)	0.021	0.021	0.021	0.021	0.021	0.021	0.021	0.021	0.023	0.023	0.021	0.021	0.021	0.021	0.025	0.028	0.028	0.028	0.028	0.028	0.028	0.028	0.028	0.028	0.028	0.028	0.028	0.028	0.028	0.028	0.028	0.028	0.028	0.028	0.028	0.025	0.025	0.025	0.021	0.018	0.025	0.022	0.022
Tyr (Y)	0.039	0.039	0.039	0.039	0.043	0.039	0.039	0.038	0.042	0.042	0.043	0.039	0.039	0.043	0.046	0.035	0.043	0.043	0.043	0.043	0.042	0.032	0.032	0.046	0.046	0.046	0.042	0.043	0.039	0.043	0.043	0.039	0.043	0.043	0.039	0.035	0.035	0.046	0.039	0.047	0.039	0.043	0.047
Val (V)	0.046	0.053	0.046	0.046	0.057	0.056	0.056	0.056	0.057	0.057	0.057	0.057	0.056	0.053	0.05	0.053	0.057	0.057	0.057	0.057	0.06	0.046	0.046	0.057	0.057	0.057	0.053	0.043	0.046	0.043	0.043	0.046	0.043	0.043	0.046	0.043	0.039	0.05	0.053	0.061	0.05	0.054	0.061
